# Supplementary material for: Photo-induced living radical polymerization of acrylates utilizing a discrete copper(ii)–formate complex
Source: Royal Society of Chemistry journal article supplement (doi:10.1039/c4cc09916h), 2015-01-01
Supplement: c4cc09916h1.pdf [file c4cc09916h1.pdf]

The structure archived in the CCDC (named TAKQUR) from the publication of Scott, Goddard and Holme, *Inorg, Chem* 1996, 35, 2558, only contains the atomic positions. The structure is in the higher symmetry space group *Pnma* in a cell of similar metrics to our compound  $[\text{Cu}(\text{Me}_6\text{-Tren})(\text{O}_2\text{CH})](\text{ClO}_4)]$ . The cif contains no refinement details, temperature, or thermal parameters or any details of any disorder encountered.

We believe the crystal structure aids in the full characterisation of the pre-catalyst and should be included in the paper. The structure has been deposited with the CCDC (CCDC 1038878 )
